# Supplementary material for: A low-sugar diet enhancesDrosophilabody size in males and females via sex-specific mechanisms
Source: Oxford University Press journal article supplement (doi:10.1242/dev.200491), 2022-02-23
Supplement: dev200491supp.pdf [file dev200491supp.pdf]

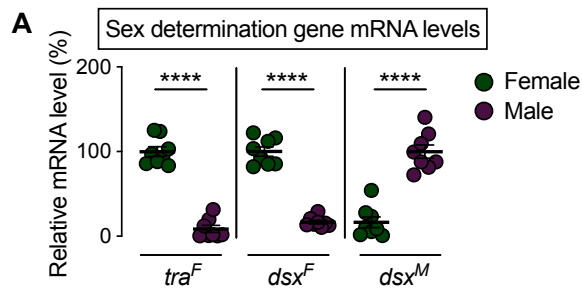

**Fig. S1. Sex determination gene expression in sexed larvae.** (A) mRNA levels of sex-specific isoforms of sex determination genes in male and female larvae (Student's *t* test). Females are expected to show expression of the female-specific isoforms of *transformer* (*tra<sup>F</sup>*) and *doublesex* (*dsx<sup>F</sup>*), whereas males are expected to show expression of the male-specific isoform of *doublesex* (*dsx<sup>M</sup>*). \*\*\*\*  $p < 0.0001$ ; error bars indicate SEM. *p*-values, samples sizes, and statistical tests are in Table S1.

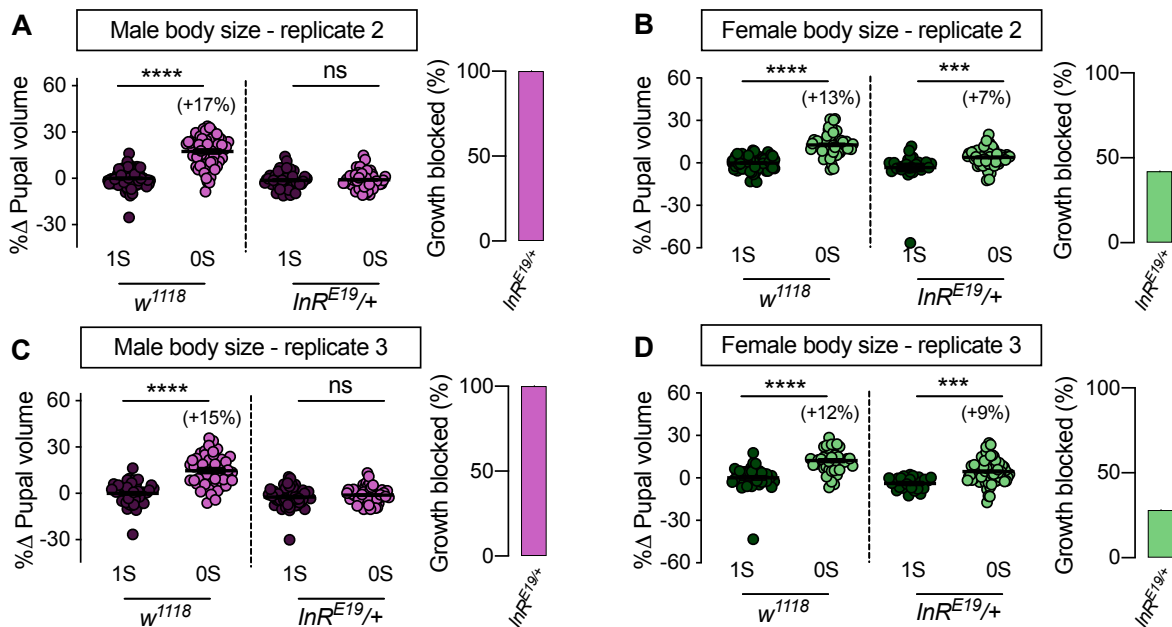

**Fig. S2. Male-biased requirement for IIS in promoting the low sugar-induced increase in body size.** (A) Pupal volume in *w<sup>1118</sup>* and *InR<sup>E19/+</sup>* females cultured on 1S or 0S (two-way ANOVA followed by Tukey HSD test).  $n = 27-61$ . (B) Pupal volume in *w<sup>1118</sup>* and *InR<sup>E19/+</sup>* males cultured on 1S or 0S (two-way ANOVA followed by Tukey HSD test).  $n = 48-74$ . (C) Pupal volume in *w<sup>1118</sup>* and *InR<sup>E19/+</sup>* females cultured on 1S or 0S (two-way ANOVA followed by Tukey HSD test).  $n = 26-73$ . (D) Pupal volume in *w<sup>1118</sup>* and *InR<sup>E19/+</sup>* males cultured on 1S or 0S (two-way ANOVA followed by Tukey HSD test).  $n = 45-51$ . To calculate sex:diet:genotype interactions three-way ANOVAs were used. \*\*\*  $p < 0.001$ ; \*\*\*\*  $p < 0.0001$ ; ns indicates not significant; error bars indicate SEM. To make percentage change pupal volume whole numbers, decimals  $< 0.5$  were rounded down, and decimals  $> 0.5$  were rounded up. *p*-values, samples sizes, and statistical tests are in Table S1.

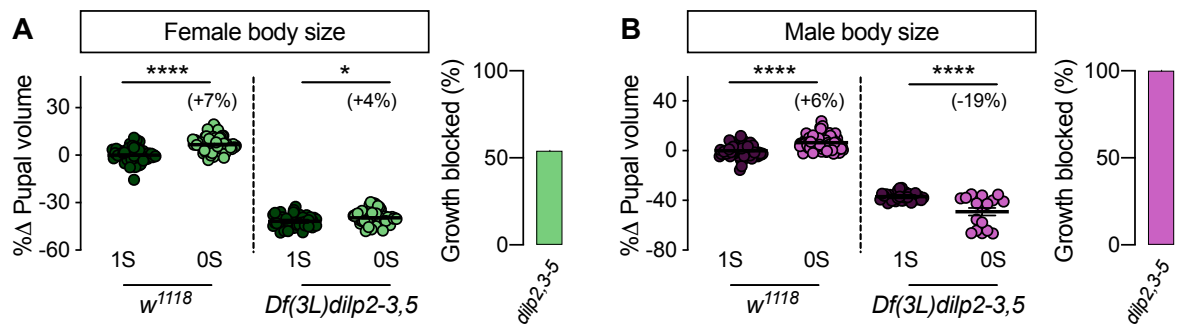

**Fig. S3. Sex-biased requirement for *Drosophila* insulin-like peptides in promoting the low sugar-induced increase in body size.** (A) Pupal volume in  $w^{1118}$  and  $dilp2-3,5$  females cultured on 1S or 0S (two-way ANOVA followed by Tukey HSD test).  $n = 50-69$ . (B) Pupal volume in  $w^{1118}$  and  $dilp2-3,5$  males cultured on 1S or 0S (two-way ANOVA followed by Tukey HSD test).  $n = 17-97$ . To calculate sex:diet:genotype interactions three-way ANOVAs were used. \*  $p < 0.05$ ; \*\*\*\*  $p < 0.0001$ ; ns indicates not significant; error bars indicate SEM. To make percentage change pupal volume whole numbers, decimals  $< 0.5$  were rounded down, and decimals  $> 0.5$  were rounded up.  $p$ -values, samples sizes, and statistical tests are in Table S1.

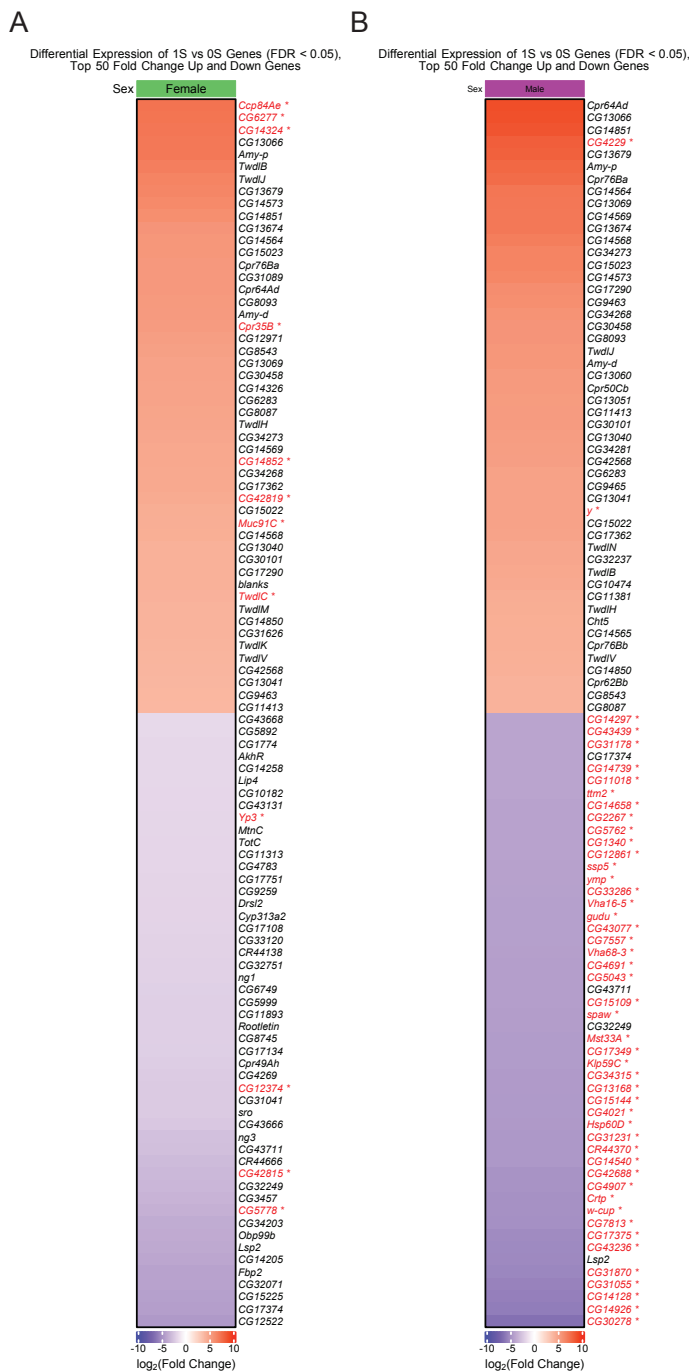

**Fig. S4. Sex-specific changes in gene expression in response to a low sugar diet.** (A) Top 50 differentially expressed upregulated and downregulated genes in females reared on a 0S diet. Differentially expressed genes unique to females are labelled in red. (B) Top 50 differentially expressed upregulated and downregulated genes in males reared on a 0S diet. Differentially expressed genes unique to males are labelled in red. A list of all differentially expressed genes is provided in Table S2.

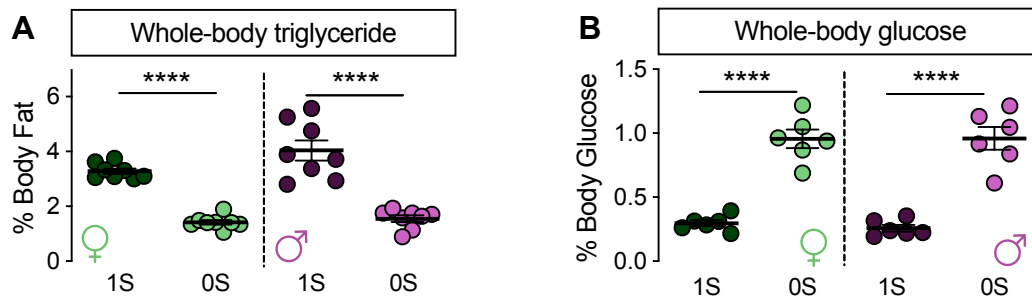

**Fig. S5. Non-sex-specific changes to whole body triglyceride and glucose levels in larvae raised on a low-sugar diet.** (A) Whole-body triglyceride levels in  $w^{1118}$  female and male larvae reared on 1S or 0S (Student's  $t$  test).  $n = 8$  biological replicates. (B) Whole-body glucose levels in  $w^{1118}$  female and male larvae cultured on 1S or 0S (Student's  $t$  test).  $n = 6$  biological replicates. \*\*\*\*  $p < 0.0001$ ; error bars indicate SEM.  $p$ -values, samples sizes, and statistical tests are in Table S1.

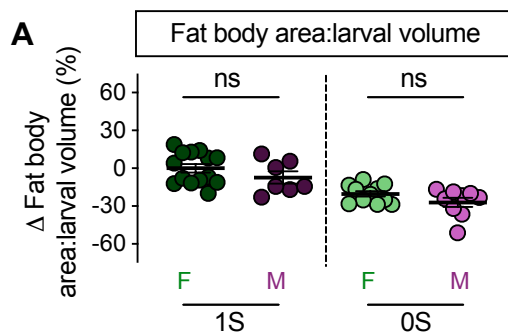

**Fig. S6. Scaling between fat body area and body size does not differ between males and females reared on 0S or 1S.** (A) The ratio of fat body area to larval volume is not different between females and males reared on either 1S or 0S (Student's  $t$  test).  $n = 7-14$ . ns indicates not significant; error bars indicate SEM.  $p$ -values, samples sizes, and statistical tests are in Table S1.

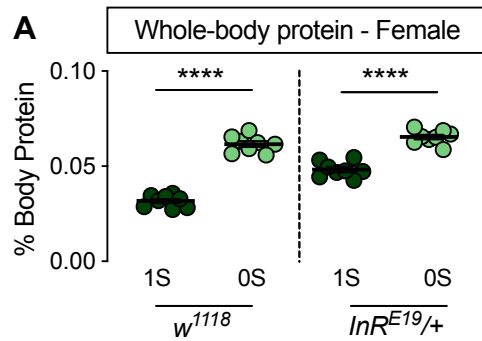

**Fig. S7. Reduced IIS function does not block the female-specific increase in whole-body protein in 0S.** (A) Whole-body protein levels in *w<sup>1118</sup>* and *InR<sup>E19/+</sup>* female larvae reared on 1S or 0S. *n* = 8 biological replicates (two-way ANOVA followed by Tukey HSD test). \*\*\*\* *p* < 0.0001; ns indicates not significant; error bars indicate SEM. *p*-values, sample sizes, and statistical tests are in Table S1.

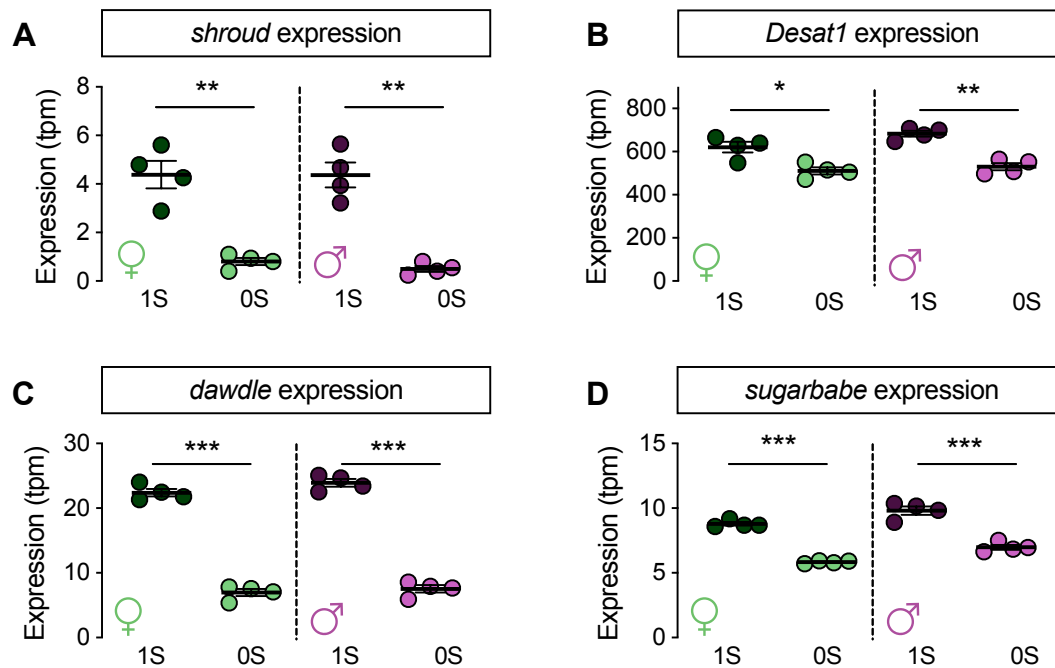

**Fig. S8. Non-sex-specific changes to *Mondolbigmax* target expression in larvae raised on a low-sugar diet.** (A) Expression of *shroud* in females and males raised in 1S and 0S from RNA-seq data (Analyzed using adjusted  $p$  values calculated in DESeq2). (B) Expression of *Desat1* in females and males raised in 1S and 0S from RNA-seq data (Analyzed using adjusted  $p$  values calculated in DESeq2). (C) Expression of *dawdle* in females and males raised in 1S and 0S from RNA-seq data (Analyzed using adjusted  $p$  values calculated in DESeq2). (D) Expression of *sugarbabe* in females and males raised in 1S and 0S from RNA-seq data (Analyzed using adjusted  $p$  values calculated in DESeq2). \*\*  $p < 0.01$ ; \*\*\*  $p < 0.001$ ; ns indicates not significant; error bars indicate SEM.  $p$ -values, sample sizes, and statistical tests are in Table S1.

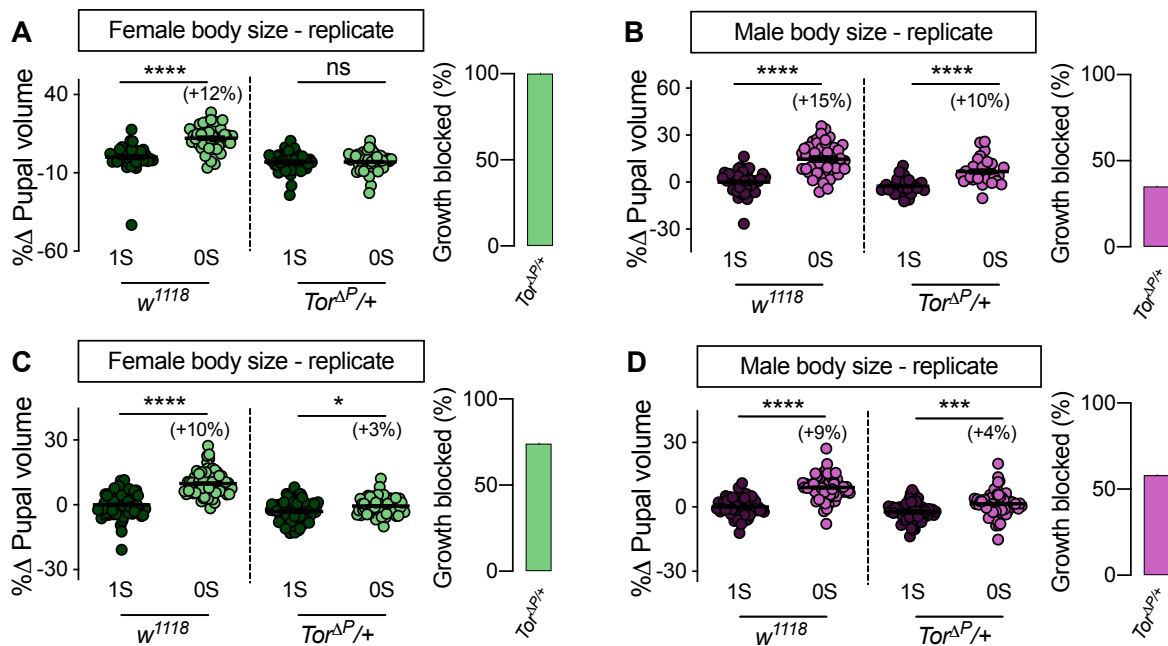

**Fig. S9. Female-biased requirement for Tor in regulating the low sugar-induced increase in body size.** (A) Pupal volume in *w<sup>1118</sup>* and *Tor<sup>ΔP/+</sup>* females cultured on 1S or 0S (two-way ANOVA followed by Tukey HSD test). *n* = 39-53. (B) Pupal volume in *w<sup>1118</sup>* and *Tor<sup>ΔP/+</sup>* males cultured on 1S or 0S (two-way ANOVA followed by Tukey HSD test). *n* = 29-49. (C) Pupal volume in *w<sup>1118</sup>* and *Tor<sup>ΔP/+</sup>* females cultured on 1S or 0S (two-way ANOVA followed by Tukey HSD test). *n* = 49-61. (D) Pupal volume in *w<sup>1118</sup>* and *Tor<sup>ΔP/+</sup>* males cultured on 1S or 0S (two-way ANOVA followed by Tukey HSD test). *n* = 56-74. To calculate sex:diet:genotype interactions three-way ANOVAs were used. \*\*\* *p* < 0.001; \*\*\*\* *p* < 0.0001; ns indicates not significant; error bars indicate SEM. To make percent change in pupal volume whole numbers, decimals < 0.5 were rounded down, and decimals > 0.5 were rounded up. *p*-values, sample sizes, and statistical tests are in Table S1.

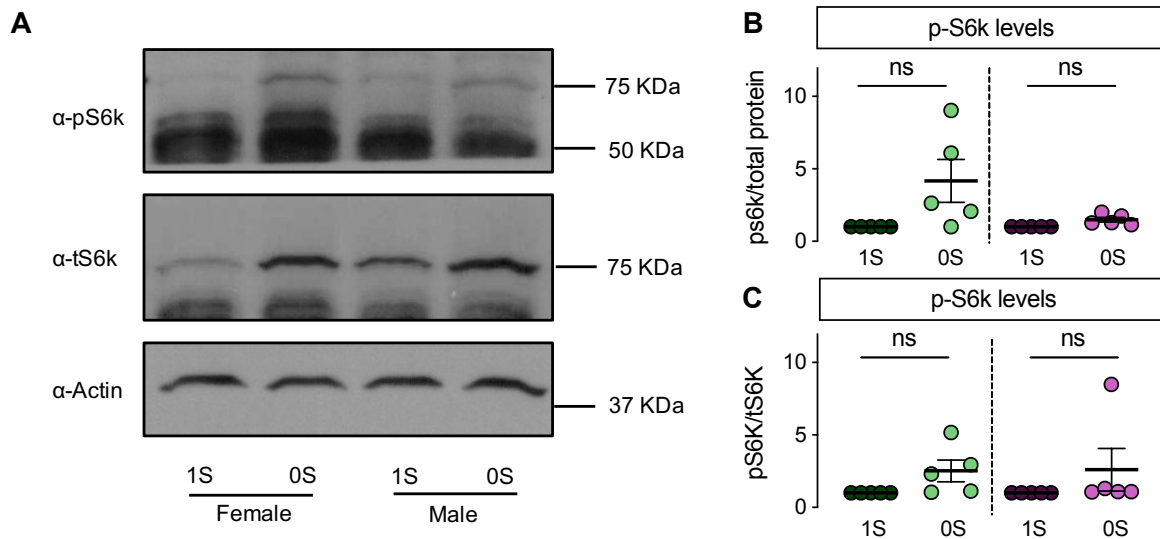

**Fig. S10. Non-sex-specific trend toward increased phosphorylated S6k in a low sugar diet.** (A) Representative blots of phospho-S6k, total S6K, and actin in male and female larvae raised in 1S or 0S diets. (B) Quantification of p-S6k/total protein levels in male and female larvae raised in 1S or 0S (Wilcoxon signed rank test). (C) Quantification of p-S6K/t-S6K levels in 1S or 0S (Wilcoxon signed rank test). \*\*  $p < 0.01$ ; ns indicates not significant; error bars indicate SEM.  $p$ -values, samples sizes, and statistical tests are in Table S1.

**Table S1. Manuscript statistical analyses and *P*-values.**

[Click here to download Table S1](#)

**Table S2. Differentially expressed genes from RNA-seq analysis of low-sugar diet-induced changes to gene expression.**

[Click here to download Table S2](#)

**Table S3. Raw values for all data collected in the manuscript.**

[Click here to download Table S3](#)

**Table S4. Recipes for all diets used in the manuscript.**

[Click here to download Table S4](#)

**Table S5. Primer list for all qPCR in the manuscript.**

[Click here to download Table S5](#)
